# Supplementary material
Source: PubMed Central journal article supplement (PMC8313085)
Supplement: mmc1.pdf [file mmc1.pdf]

**Electronic Supporting Information**

**In Search of SARS CoV-2 Replication  
Inhibitors: Virtual Screening, Molecular  
Dynamics Simulations and ADMET Analysis**

Prinsa R. Nagar,<sup>a,b</sup> Normi D. Gajjarn,<sup>a,b</sup> and Tejas M. Dhameliya<sup>a,\*</sup>

<sup>a</sup>L. M. College of Pharmacy, Navrangpura, Ahmedabad 380 009, Gujarat, India.

<sup>b</sup>PRN and NDG contributed equally to the present work.

\*Corresponding Authors: E-mail: tejas.dhameliya@lmcp.ac.in;  
tmdhameliya@gmail.com. Tel: +91 79 2630 2746.

**Table of Contents**

|                                                   |   |
|---------------------------------------------------|---|
| 1. 2-D diagrams of Identified Hit Molecules ..... | 2 |
| 2. MD Simulations .....                           | 6 |
| 3. Reference .....                                | 7 |

## 1. 2-D diagrams of Identified Hit Molecules

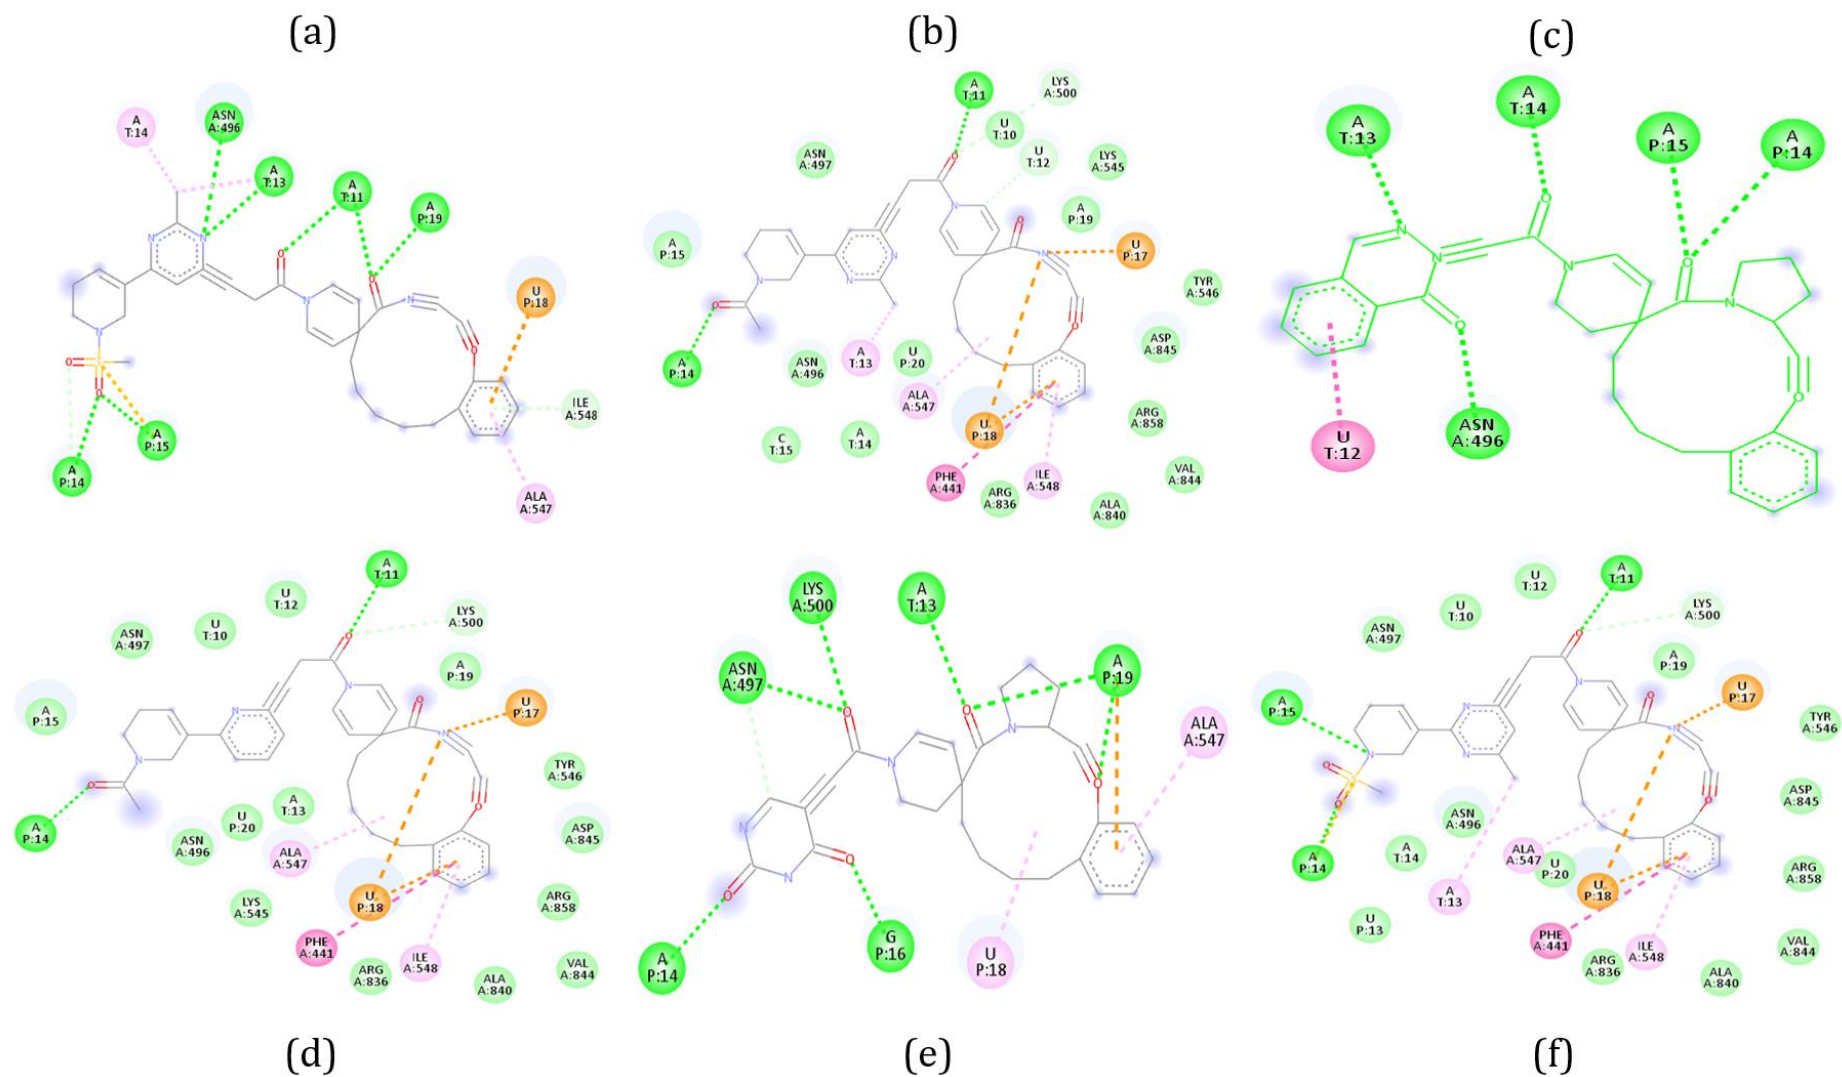

**Figure S1.** 2-D interactions of ligands **2** (a), **3** (b), **4** (c), **5** (d), **6** (e) and **7** (f) complexed with RdRp. Poses have been generated using Biovia Discovery Studio 2020.[1]

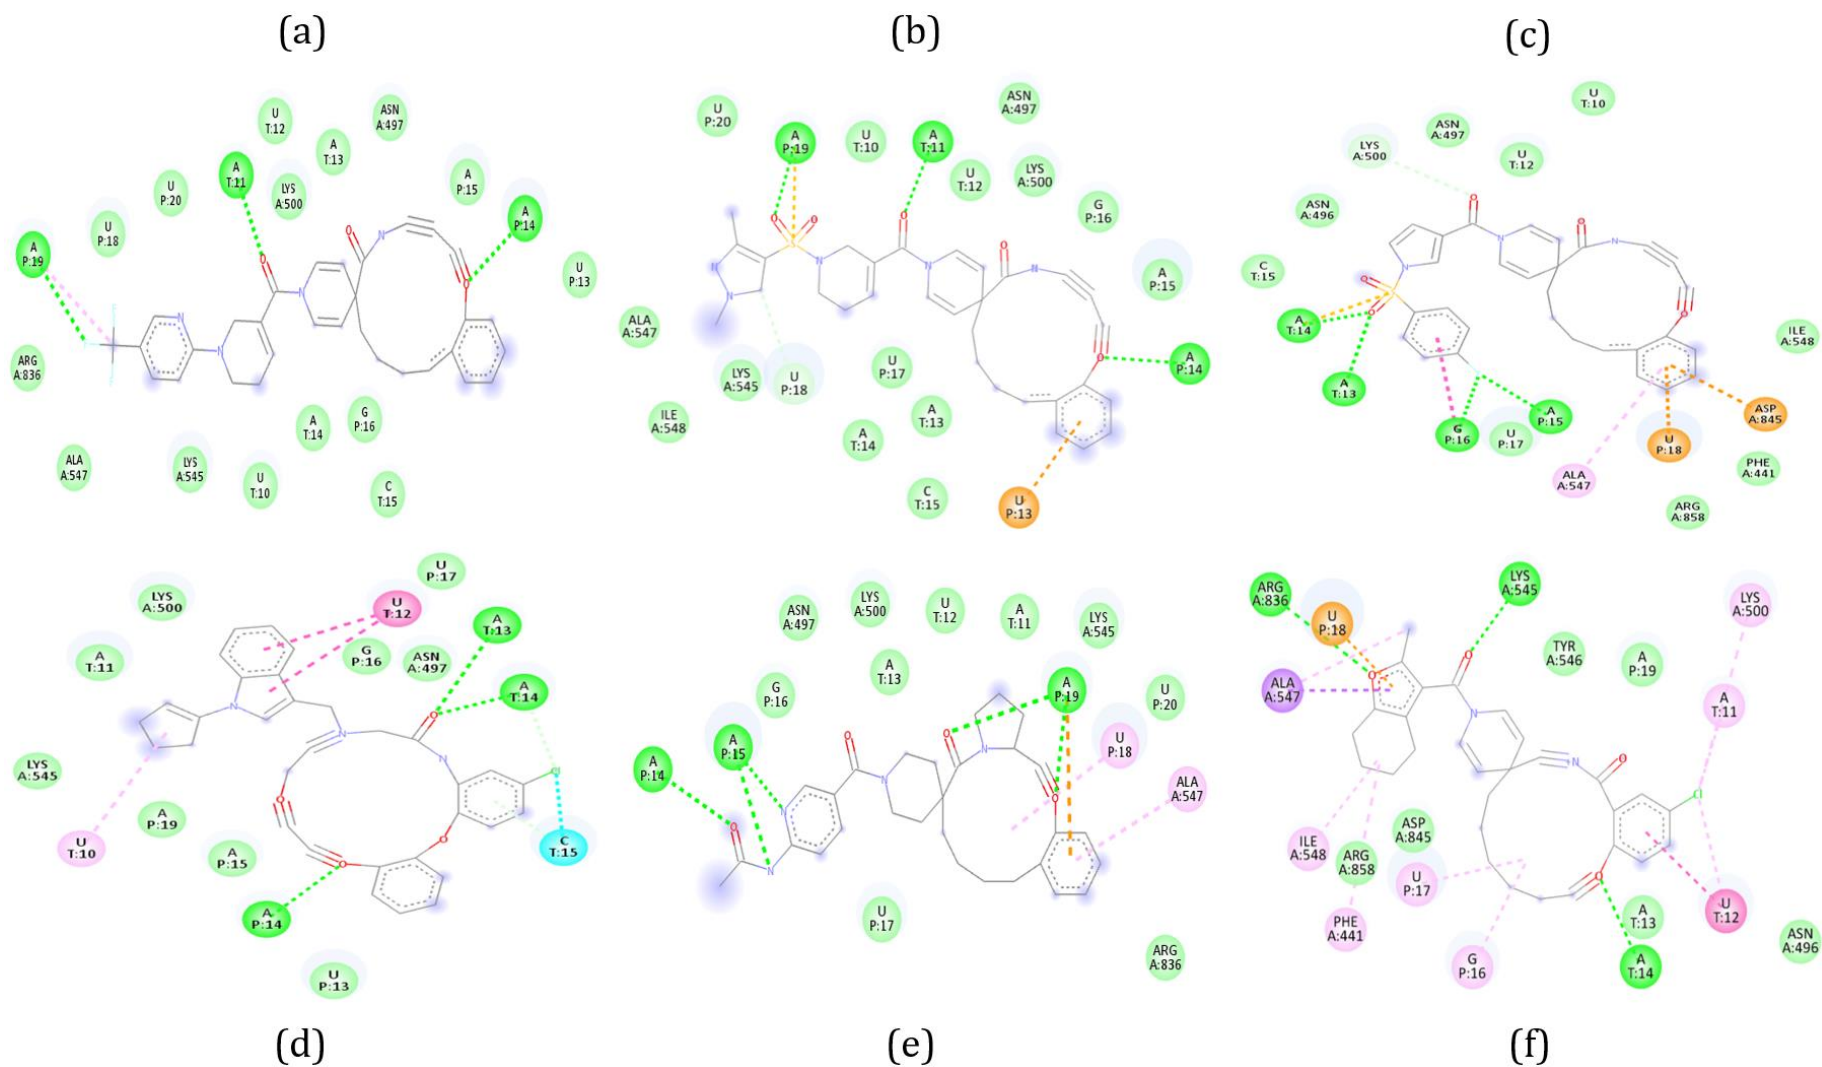

**Figure S2.** 2-D interactions of ligands **8** (a), **9** (b), **10** (c), **11** (d), **12** (e) and **13** (f) with RdRp (PDB ID: 7BV2). Interactive poses of hits have been generated using Biovia Discovery Studio 2020.[1]

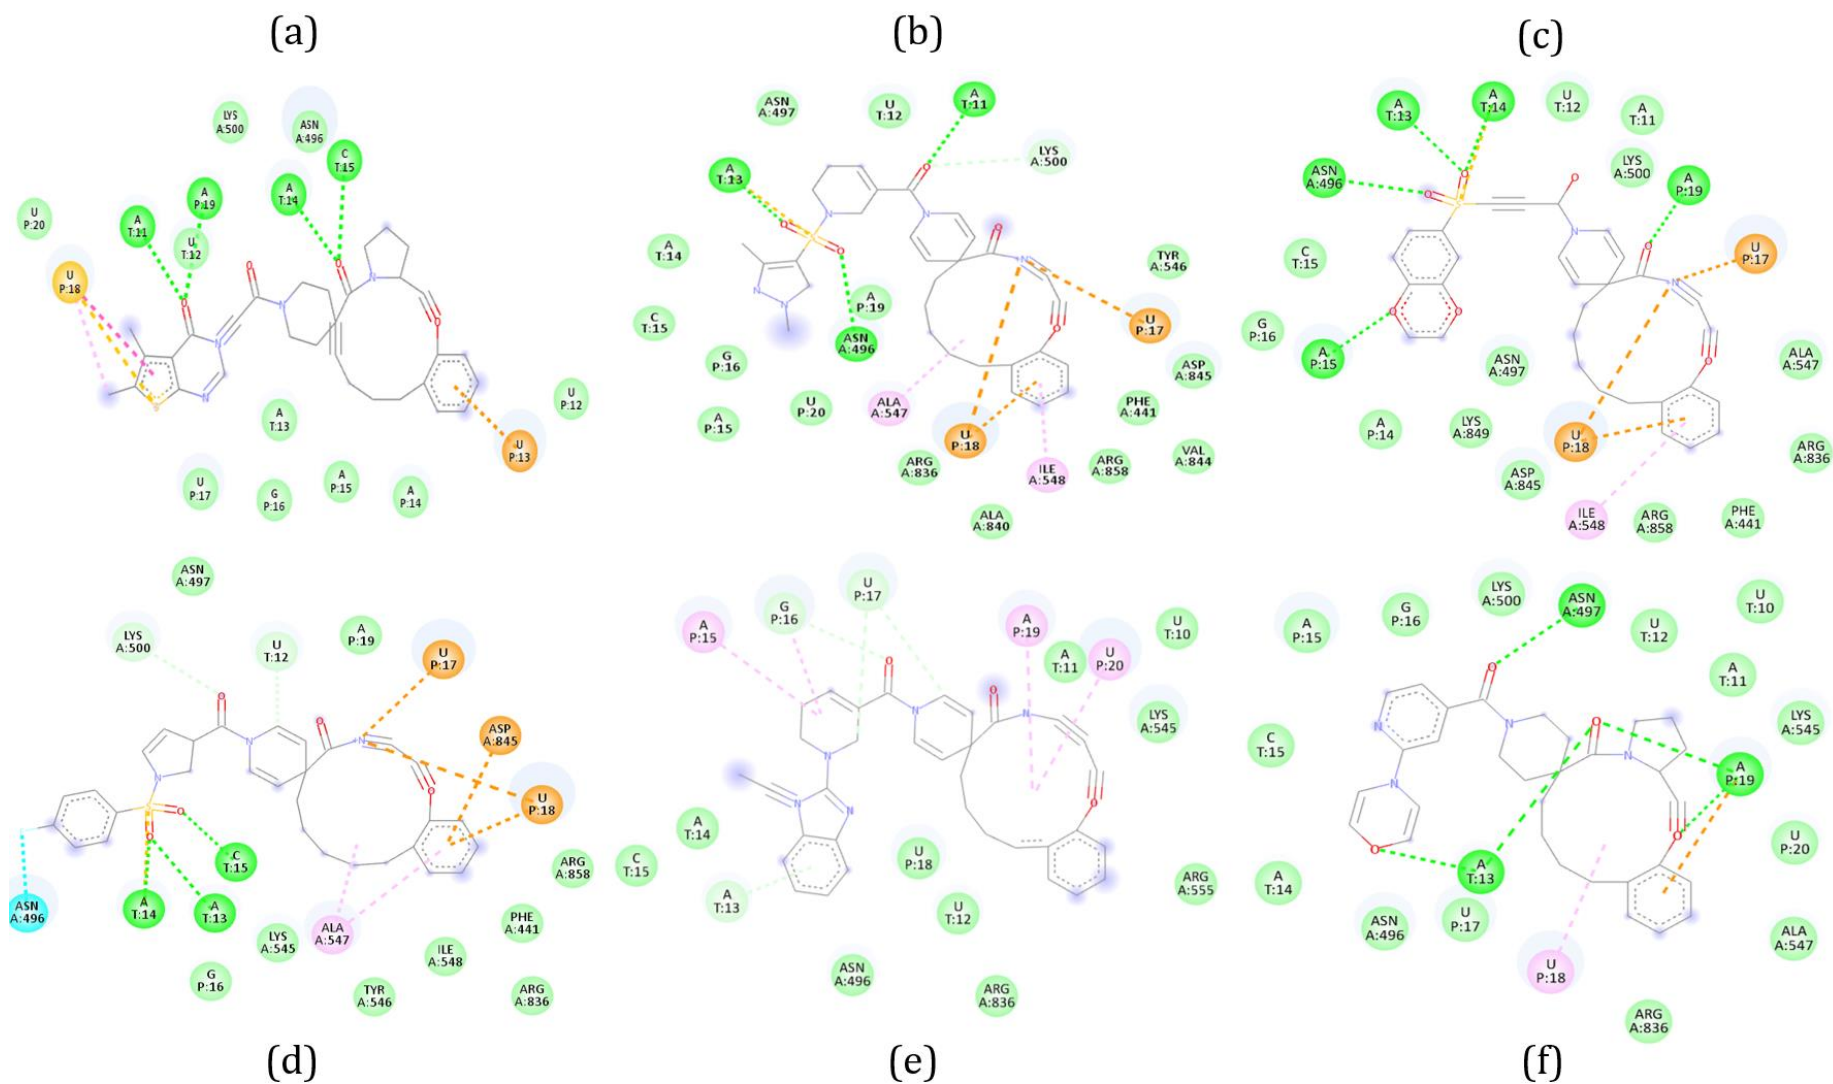

**Figure S3.** 2-D interactions of ligands compound **14** (a), compound **15** (b), compound **16** (c), compound **17** (d), compound **18** (e) and compound **19** (f) with 7BV2. Poses have been generated using Biovia Discovery Studio 2020.[1]

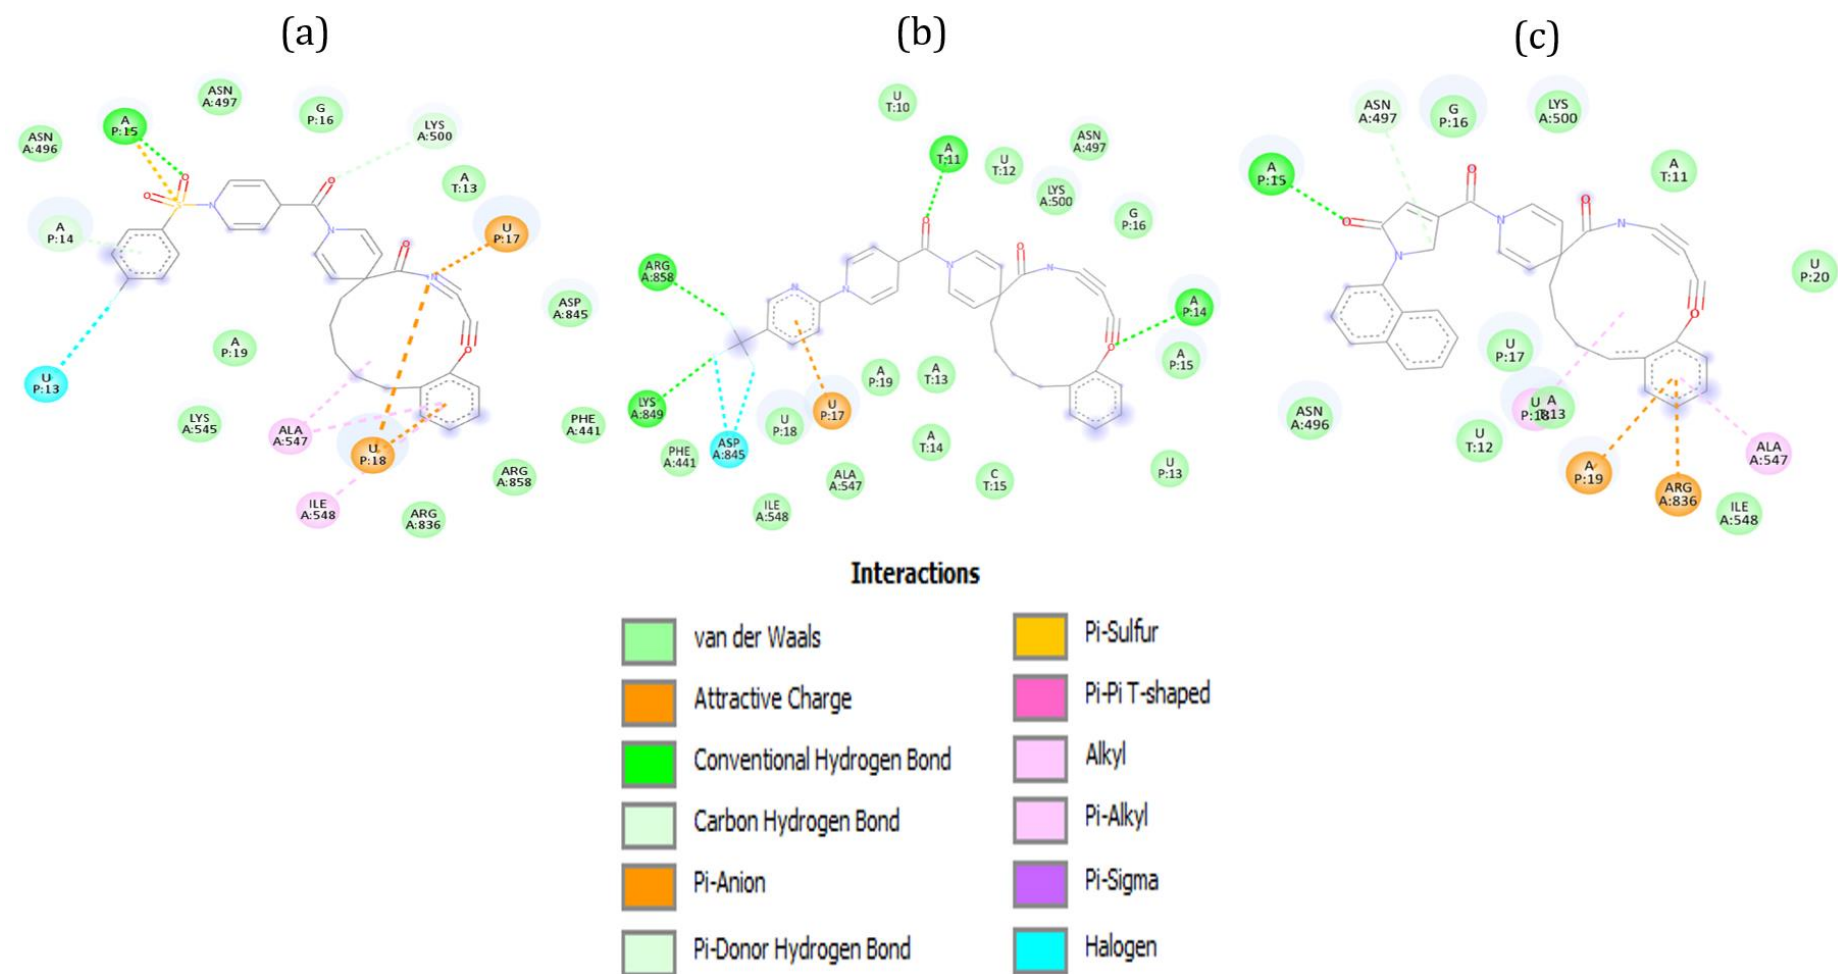

**Figure S4.** 2-D interactions of ligands **20** (a), **21** (b) and **22** (c) with 7BV2 (RdRp). Poses have been generated using Biovia Discovery Studio 2020.[1]



## 2. MD Simulations

Systems of MD simulation were assessed for their equilibration in terms of energy (kcal/mol), pressure (bar) and temperature (K) and were found to be equilibrated satisfactorily as these values were found to have consistency over the run time of the 10 ns (

Figure S5, and Figure S6 for compounds **2** and **3**, respectively). For the complex of **2** with RdRp, average energy, pressure and temperature were observed -1378180 kJ/mol, 1.082 bar and 300.011 K, respectively. Similarly, for the complex of **3** with RdRp, average energy, pressure and temperature were estimated -1378250 kJ/mol, 0.822 bar and 300.005 K, respectively.

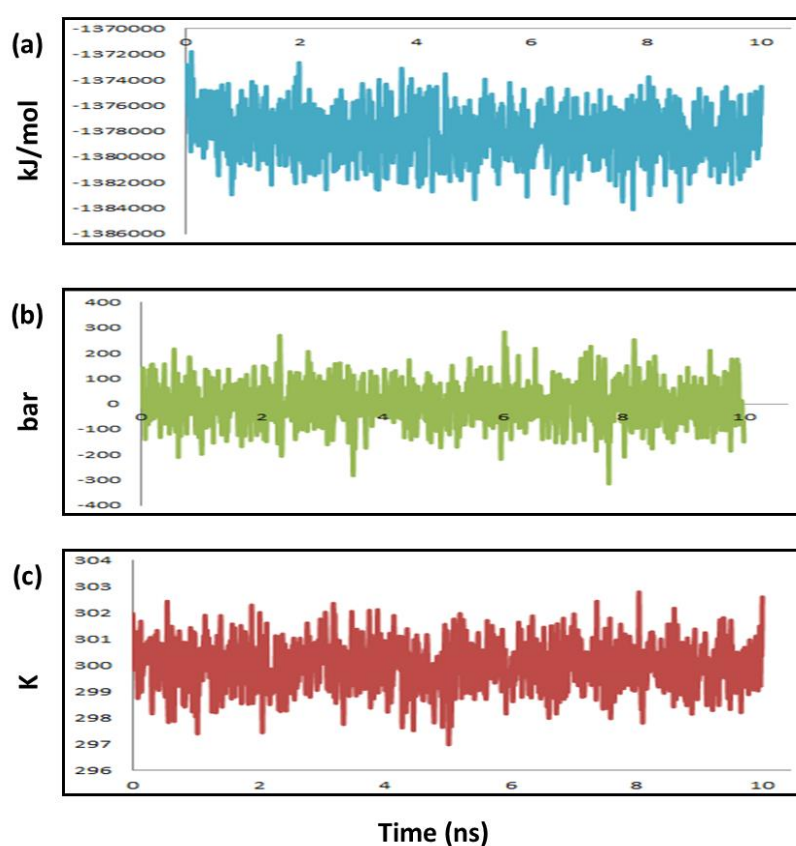

**Figure S5.** Energy equilibria (a), pressure equilibria (b) and temperature equilibria (c) of trajectory of complex of compound **2** with RdRp.

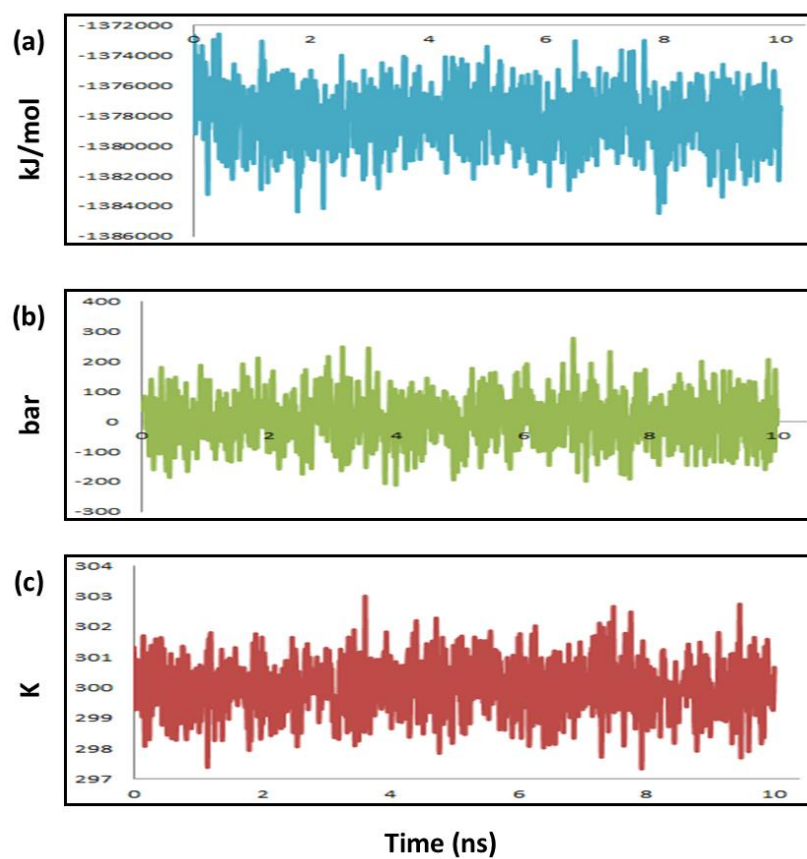

**Figure S6.** Energy equilibria (a), pressure equilibria (b) and temperature equilibria (c) of trajectory of complex of compound **3** with RdRp.

### 3. Reference

- (1) Dassault Systèmes BIOVIA, BIOVIA Workbook, Release 2021; BIOVIA DS Visualizer, Release 2021, San Diego: Dassault Systèmes, 2021.
